# Supplementary material for: Measuring originality in science
Source: Springer Nature journal article supplement (doi:10.1007/s11192-019-03263-0), 2019-11-11
Supplement: 11192_2019_3263_MOESM1_ESM.pdf [file 11192_2019_3263_MOESM1_ESM.pdf]

## **Supplementary Information**

### **Measuring Originality in Science**

Sotaro Shibayama<sup>1,\*</sup> and Jian Wang<sup>2</sup>

<sup>1</sup> School of Economics and Management, Lund University, Lund, 22363, Sweden

<sup>2</sup> Leiden University, Leiden, 2333 CA, Netherlands

\*Corresponding author:

Email: [sotaro.shibayama@fek.lu.se](mailto:sotaro.shibayama@fek.lu.se)

Phone: +46 (0)46 2227812

**Figure S1. Distribution of proposed originality measures**

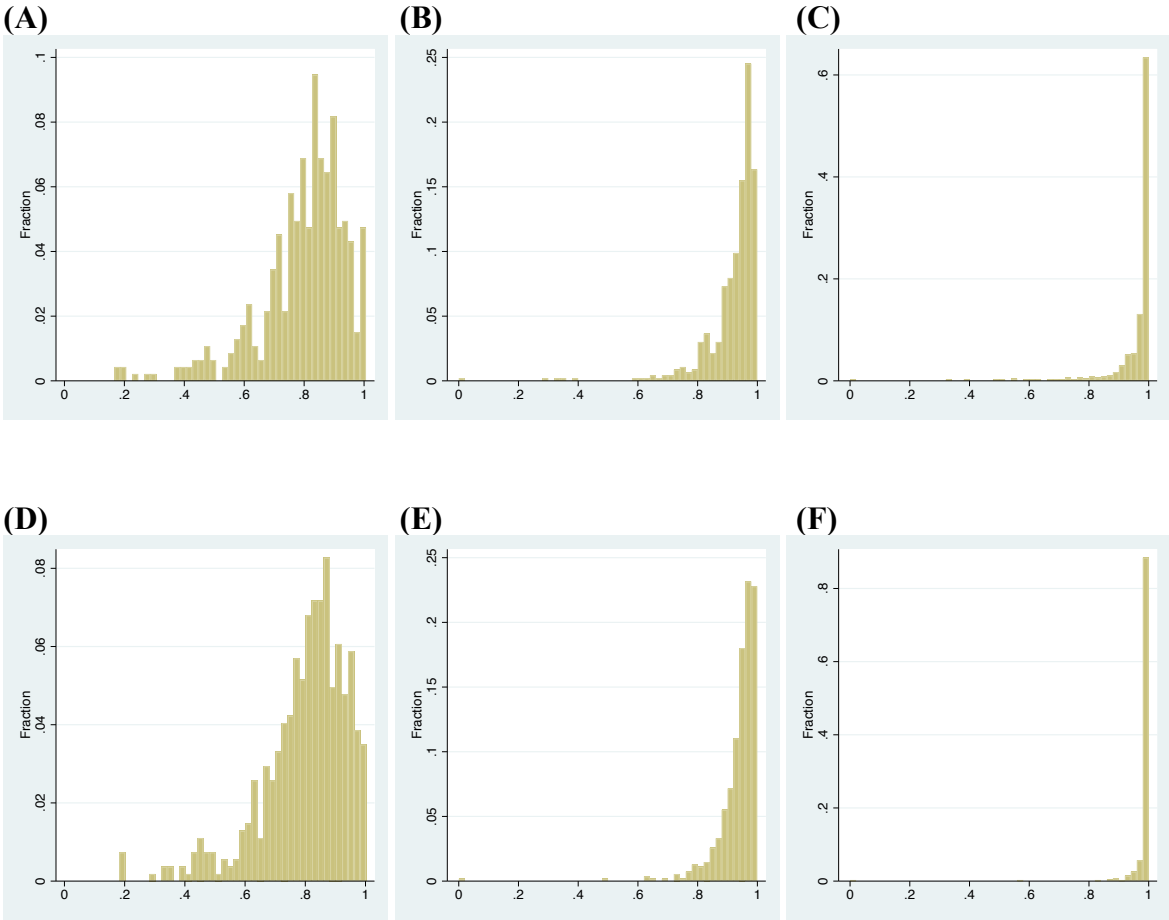

Note. (A) Base measure computed with first-year citing publications.  $N = 465$ . (B) Weighted measure 1 computed with first-year citing publications.  $L = 14.4$ .  $N = 465$ . (C) Weighted measure 2 computed with first-year citing publications.  $L = 57.6$ .  $N = 465$ . (D) Base measure computed with the first three citing publications.  $N = 544$ . (E) Weighted measure 1 computed with the first three citing publications.  $L = 12.0$ .  $N = 544$ . (F) Weighted measure 2 computed with the first three citing publications.  $L = 14.0$ .  $N = 544$ .

**Figure S2. Correlation between the proposed originality measures (mean at the scientist level) and self-assessed originality**

**(A) Originality measured with citing publications in the first  $t$  years ( $t = 1, \dots, 6$ )**

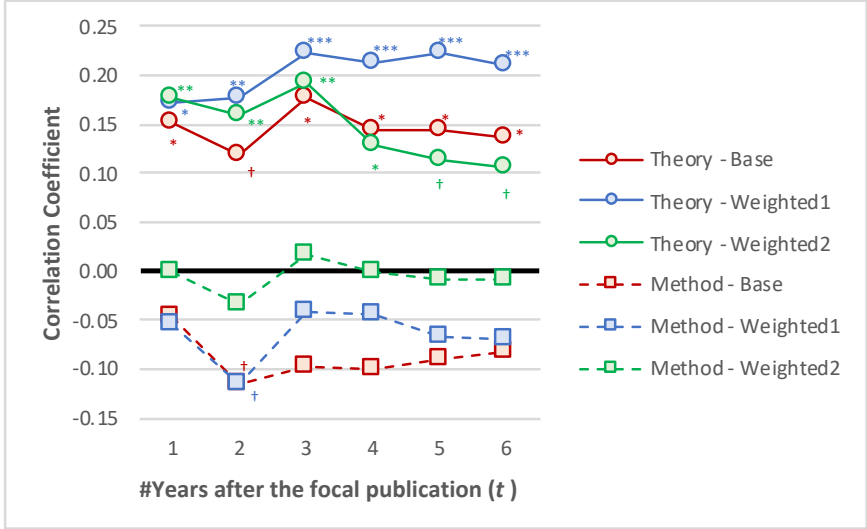

**(B) Originality measured with the first  $s$  citing publications ( $s = 1, \dots, 6$ )**

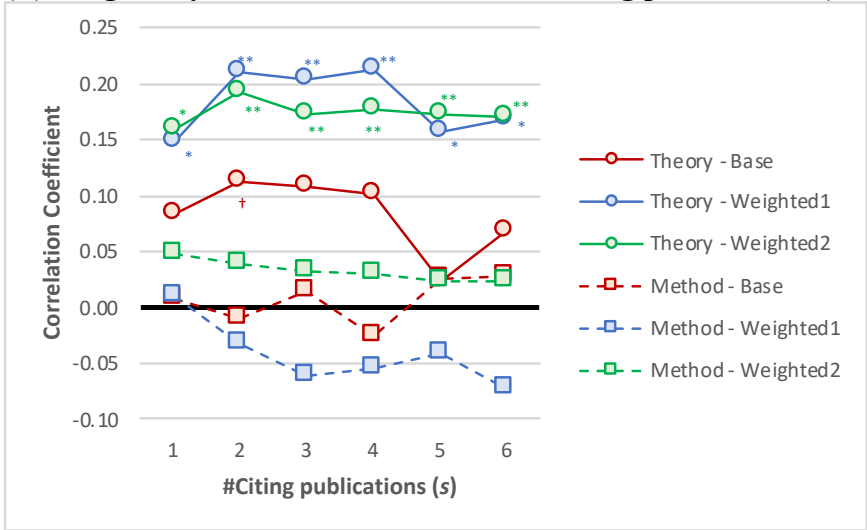

Notes. † $p < 0.1$ . \* $p < 0.05$ . \*\* $p < 0.01$ . \*\*\* $p < 0.001$ . (A) The sample size ranges from 219 to 245. (B) The sample size ranges from 197 to 244.

**Table S1. Correlation between the proposed originality measures and self-assessed originality**

**(A) Originality measured with citing publications in the first  $t$  years and self-assessed theoretical originality**

| $t$ | $N$ | Theory - Base | Theory - Weighted1 | Theory - Weighted2 |
|-----|-----|---------------|--------------------|--------------------|
| 1   | 461 | 0.130 *       | 0.136 ***          | 0.142 ***          |
| 2   | 516 | 0.099 †       | 0.147 **           | 0.138 **           |
| 3   | 540 | 0.147 **      | 0.174 ***          | 0.143 ***          |
| 4   | 549 | 0.120 *       | 0.163 ***          | 0.087              |
| 5   | 551 | 0.120 *       | 0.160 ***          | 0.074              |
| 6   | 553 | 0.113 *       | 0.145 ***          | 0.066              |

**(B) Originality measured with citing publications in the first  $t$  years and self-assessed methodological originality**

| $t$ | $N$ | Method - Base | Method - Weighted1 | Method - Weighted2 |
|-----|-----|---------------|--------------------|--------------------|
| 1   | 455 | -0.040        | -0.044             | -0.002             |
| 2   | 510 | -0.096 †      | -0.097 *           | -0.028             |
| 3   | 534 | -0.082        | -0.033             | 0.012              |
| 4   | 543 | -0.083        | -0.034             | 0.000              |
| 5   | 545 | -0.076        | -0.047             | -0.006             |
| 6   | 547 | -0.070        | -0.048             | -0.005             |

**(C) Originality measured with the first  $s$  citing publications and self-assessed theoretical originality**

| $s$ | $N$ | Theory - Base | Theory - Weighted1 | Theory - Weighted2 |
|-----|-----|---------------|--------------------|--------------------|
| 1   | 540 | 0.067         | 0.110 **           | 0.107 ***          |
| 2   | 502 | 0.093 †       | 0.169 ***          | 0.130 *            |
| 3   | 468 | 0.091         | 0.174 ***          | 0.149 **           |
| 4   | 430 | 0.090         | 0.185 **           | 0.171 **           |
| 5   | 390 | 0.022         | 0.144 *            | 0.144 *            |
| 6   | 359 | 0.060         | 0.156 *            | 0.182 ***          |

**(D) Originality measured with the first  $s$  citing publications and self-assessed methodological originality**

| $s$ | $N$ | Method - Base | Method - Weighted1 | Method - Weighted2 |
|-----|-----|---------------|--------------------|--------------------|
| 1   | 534 | 0.005         | 0.007              | 0.032              |
| 2   | 496 | -0.008        | -0.027             | -0.023             |
| 3   | 463 | 0.012         | -0.053             | -0.015             |
| 4   | 425 | -0.022        | -0.048             | -0.010             |
| 5   | 385 | 0.023         | -0.038             | 0.008              |
| 6   | 354 | 0.025         | -0.067             | 0.020              |

Note. † $p < 0.1$ , \* $p < 0.05$ , \*\* $p < 0.01$ , \*\*\* $p < 0.001$ . Since our respondents can have multiple papers, we introduced a weight (the reciprocal of the paper count) into the computation of correlation coefficients.

**Table S2. Prediction of Citation Rank**

|                                 | Model 1  |         | Model 2  |         | Model 3    |          |
|---------------------------------|----------|---------|----------|---------|------------|----------|
| <i>ln N</i>                     | 1.433**  | (0.553) | 1.399*   | (0.578) | 1.043†     | (0.566)  |
| <i>Orig<sub>base</sub></i>      | 1.149    | (1.553) |          |         |            |          |
| <i>Orig<sub>weighted1</sub></i> |          |         | 2.780    | (3.795) |            |          |
| <i>Orig<sub>weighted2</sub></i> |          |         |          |         | 107.669*** | (31.184) |
| Chi-squared stat                | 11.093** |         | 11.698** |         | 23.464***  |          |
| Log likelihood                  | -153.715 |         | -153.729 |         | -148.852   |          |
| N                               | 439      |         | 439      |         | 439        |          |
| #Scientist                      | 205      |         | 205      |         | 205        |          |

  

|                                 | Model 4  |         | Model 5   |         | Model 6    |          |
|---------------------------------|----------|---------|-----------|---------|------------|----------|
| <i>ln N</i>                     | 1.175*   | (0.571) | 1.096†    | (0.587) | 0.838      | (0.583)  |
| <i>Orig<sub>base</sub></i>      | 4.442*   | (2.116) |           |         |            |          |
| <i>Orig<sub>weighted1</sub></i> |          |         | 10.910*   | (5.144) |            |          |
| <i>Orig<sub>weighted2</sub></i> |          |         |           |         | 162.262*** | (45.624) |
| Chi-squared stat                | 12.389** |         | 15.526*** |         | 20.038***  |          |
| Log likelihood                  | -149.057 |         | -149.585  |         | -144.919   |          |
| N                               | 410      |         | 410       |         | 410        |          |
| #Scientist                      | 194      |         | 194       |         | 194        |          |

  

|                                 | Model 7  |         | Model 8   |         | Model 9    |          |
|---------------------------------|----------|---------|-----------|---------|------------|----------|
| <i>ln N</i>                     | 0.930†   | (0.562) | 0.796     | (0.572) | 0.627      | (0.568)  |
| <i>Orig<sub>base</sub></i>      | 5.313*   | (2.349) |           |         |            |          |
| <i>Orig<sub>weighted1</sub></i> |          |         | 14.686**  | (5.266) |            |          |
| <i>Orig<sub>weighted2</sub></i> |          |         |           |         | 166.365*** | (48.996) |
| Chi-squared stat                | 10.804** |         | 16.115*** |         | 16.911***  |          |
| Log likelihood                  | -144.937 |         | -144.796  |         | -140.905   |          |
| N                               | 375      |         | 375       |         | 375        |          |
| #Scientist                      | 185      |         | 185       |         | 185        |          |

Notes. Logistic regressions with errors clustered in scientists. Unstandardised coefficients (robust errors in parentheses). Two-tailed test. †p<0.1, \*p<0.05, \*\*p<0.01, \*\*\*p<0.001. Only focal articles published in 2008 or before are included in the analysis to allow a 10-year citation window. Originality measured with *s* citing publications: *s* = 2 (Models 1-3), *s* = 3 (Models 4-6), and *s* = 4 (Models 7-9).
